# Supplementary material
Source: MDPI journal article supplement (https://www.mdpi.com/2073-445X/13/4/545)
Supplement: s1 [file s1]

## Supplementary Materials

Table S1. mathematical notation

| Notation  | Description                                                                                                                                                                             |
|-----------|-----------------------------------------------------------------------------------------------------------------------------------------------------------------------------------------|
| $T$       | number of time points                                                                                                                                                                   |
| $Y_t$     | year at time point $t$                                                                                                                                                                  |
| $t$       | index for a time point                                                                                                                                                                  |
| $J$       | number of categories                                                                                                                                                                    |
| $i$       | index for a category                                                                                                                                                                    |
| $j$       | index for a category                                                                                                                                                                    |
| $C_{tij}$ | number of pixels that are category $i$ at time point $t$ and category $j$ at time point $t+1$                                                                                           |
| $C_{tji}$ | number of pixels that are category $j$ at time point $t$ and category $i$ at time point $t+1$                                                                                           |
| $R_{tij}$ | intensity of annual transition from category $i$ to category $j$ during time interval $[Y_t, Y_{t+1}]$ relative to size of category $i$ at time point $t$                               |
| $W_{tj}$  | uniform intensity of annual transition from all non- $j$ categories to category $j$ during time interval $[Y_t, Y_{t+1}]$ relative to size of all non- $j$ categories at time point $t$ |
| $y$       | dependent variable                                                                                                                                                                      |
| $a$       | constant                                                                                                                                                                                |
| $b$       | determination coefficient                                                                                                                                                               |
| $x$       | independent variable                                                                                                                                                                    |

Text S1. Equations for linear regression analysis

Equation 1 gives the linear regression, which identifies the correlation between gross domestic product and total population.

$$y = a + b_x \quad (1)$$

## Text S2. The calculation methods for transition pattern analysis

The transition pattern analysis investigates the relationship between the transition intensity  $R_{tij}$  from category  $i$  to category  $j$  and the uniform transition intensity  $W_{tj}$ , considering the increase in category  $j$  during the time interval  $[Y_t, Y_{t+1}]$ . If  $R_{tij} < W_{tj}$ , then the gain of  $j$  avoids  $i$ , indicating that the gain of  $j$  transitions from  $i$  with less intensity during the time interval  $[Y_t, Y_{t+1}]$  compared to if the gain of  $j$  had transitioned uniformly from a location other than  $j$  at time  $Y_t$ . If the gain of target  $j$ , denoted as  $R_{tij}$ , is greater than the gain of target  $i$ , denoted as  $W_{tj}$ , then throughout the time period  $[Y_t, Y_{t+1}]$ , the transition of gain from target  $j$  to target  $i$  is more intense compared to a uniform transition from a different target at time  $Y_t$ . The intended sequencing of subscripts  $j$  and  $i$  in  $C_{tji}$  ensures that while summing over  $i$ , category  $j$  is subtracted at the initial time  $Y_t$ .

$$R_{tij} = \frac{C_{tij} 100\%}{(Y_{t+1} - Y_t) \sum_{j=1}^J C_{tij}}$$
$$W_{tj} = \frac{[(\sum_{i=1}^J C_{tij}) - C_{tij}] 100\%}{(Y_{t+1} - Y_t) \sum_{i=1}^J [(\sum_{j=1}^J C_{tij}) - C_{tji}]}$$
